# Supplementary material for: An Exploration of Common Greenhouse Gas Emissions by the Cyanobiont of the Azolla–Nostoc Symbiosis and Clues as to Nod Factors in Cyanobacteria
Source: MDPI journal article supplement (doi:10.3390/plants8120587), 2019-12-10
Supplement: s1 [file s1]

NCBI Blastqbj[KIF42822.1] x +

blast.ncbi.nlm.nih.gov/Blast.cgi

407

Other reports

[Distance tree of results](#) [Multiple alignment](#) [MSA viewer](#) ?

Descriptions | Graphic Summary | Alignments | Taxonomy

Sequences producing significant alignments Download Manage Columns Show 500 ?

7 sequences selected GenPept Graphics Distance tree of results Multiple alignment

**Sequences with E-value BETTER than threshold**

select all 1 sequences selected PSI-BLAST iteration 1

| Description                                                                           | Max score | Total score | Query cover | E value | Per. Ident | Accession  | Select for PSI blast                | Used to build PSSM                  | Newly added                         |
|---------------------------------------------------------------------------------------|-----------|-------------|-------------|---------|------------|------------|-------------------------------------|-------------------------------------|-------------------------------------|
| <input checked="" type="checkbox"/> multicopper oxidase type 3 [Nostoc azollae' 0708] | 38.1      | 38.1        | 30%         | 5e-04   | 21.95%     | ADI63907.1 | <input checked="" type="checkbox"/> | <input checked="" type="checkbox"/> | <input checked="" type="checkbox"/> |

Run PSI-BLAST Iteration 2 with max number of sequences  Run

**Sequences with E-value WORSE than threshold**

select all 6 sequences selected PSI-BLAST iteration 1

[Feedback](#)

Type here to search

1:48 AM 12/9/2019

Figure S1. Screenshot of PSI-BLAST result for Nitrite Reductases in *N. azollae*.

NCBI Blastemb[CAA67139.1] x +

blast.ncbi.nlm.nih.gov/Blast.cgi

Distance tree of results Multiple alignment MSA viewer ?

Descriptions Graphic Summary Alignments Taxonomy

Sequences producing significant alignments Download Manage Columns Show 500 ?

0 sequences selected GenPept Graphics Distance tree of results Multiple alignment

Sequences with E-value BETTER than threshold

select all 0 sequences selected PSI-BLAST iteration 1

|                          | Description                                                               | Max score | Total score | Query cover | E value | Per. Ident | Accession                      | Select for PSI blast                | Used to build PSSM | Newly added |
|--------------------------|---------------------------------------------------------------------------|-----------|-------------|-------------|---------|------------|--------------------------------|-------------------------------------|--------------------|-------------|
| <input type="checkbox"/> | <a href="#">hypothetical protein B7486_09925 [cyanobacterium TDX16]</a>   | 139       | 139         | 88%         | 2e-34   | 27.21%     | <a href="#">QWY71959.1</a>     | <input checked="" type="checkbox"/> |                    |             |
| <input type="checkbox"/> | <a href="#">hypothetical protein B7486_15065 [cyanobacterium TDX16]</a>   | 125       | 125         | 79%         | 2e-29   | 26.74%     | <a href="#">QWY70916.1</a>     | <input checked="" type="checkbox"/> |                    |             |
| <input type="checkbox"/> | <a href="#">glycosyltransferase [Nostoc sp. 3335mG]</a>                   | 122       | 122         | 55%         | 6e-28   | 35.32%     | <a href="#">WP_110149044.1</a> | <input checked="" type="checkbox"/> |                    |             |
| <input type="checkbox"/> | <a href="#">glycosyltransferase [Calothrix sp. HK-06]</a>                 | 118       | 118         | 53%         | 2e-26   | 32.93%     | <a href="#">WP_073620006.1</a> | <input checked="" type="checkbox"/> |                    |             |
| <input type="checkbox"/> | <a href="#">MULTISPECIES_glycosyltransferase [unclassified Calothrix]</a> | 118       | 118         | 62%         | 2e-26   | 30.45%     | <a href="#">WP_098692806.1</a> | <input checked="" type="checkbox"/> |                    |             |
| <input type="checkbox"/> | <a href="#">glycosyltransferase [cyanobacterium PCC 7702]</a>             | 108       | 108         | 61%         | 4e-23   | 30.14%     | <a href="#">WP_017323624.1</a> | <input checked="" type="checkbox"/> |                    |             |
| <input type="checkbox"/> | <a href="#">glycosyltransferase [Nostoc sp. 3335mG]</a>                   | 108       | 108         | 52%         | 5e-23   | 32.91%     | <a href="#">WP_110149102.1</a> | <input checked="" type="checkbox"/> |                    |             |
| <input type="checkbox"/> | <a href="#">glycosyltransferase [Calothrix elsteri]</a>                   | 105       | 105         | 53%         | 3e-22   | 29.46%     | <a href="#">WP_095722418.1</a> | <input checked="" type="checkbox"/> |                    |             |
| <input type="checkbox"/> | <a href="#">glycosyltransferase [Nostoc sp. 3335mG]</a>                   | 97.8      | 97.8        | 52%         | 1e-19   | 32.77%     | <a href="#">WP_110155217.1</a> | <input checked="" type="checkbox"/> |                    |             |

Feedback

Type here to search

9:55 PM 11/27/2019

**Figure S2.** Screenshot of PSI-BLAST query result when NodC nodulation protein from *R. leucaenae* USDA 9039 was searched, specifically on cyanobacteria.
